# Supplementary material
Source: PubMed Central journal article supplement (PMC4036119)
Supplement: NIHMS574426-supplement-01.pdf [file NIHMS574426-supplement-01.pdf]

Supplementary Material

**Table S1. Corticosteroid use by Treatment Group**

|                                                            | IE             | IT           | SE             | ST           | p-value* |
|------------------------------------------------------------|----------------|--------------|----------------|--------------|----------|
| N (%) of total in treatment arm                            | 244 (32.3)     | 132 (17.5)   | 255 (33.8)     | 124 (16.4)   |          |
| N (%) using oral steroids at baseline                      | 106 (43.4)     | 61 (46.2)    | 112 (43.9)     | 42 (33.9)    | 0.1788   |
| N (%) using at baseline that discontinued use during trial | 42/109 (38.5)  | 24/61 (39.3) | 30/112 (26.8)  | 15/43 (34.9) | 0.2166   |
| N (%) not using at baseline that used during trial         | 101/138 (73.2) | 57/71 (80.3) | 104/143 (72.7) | 68/82 (82.9) | 0.2148   |
| N (%) receiving one or more injections during trial        | 32 (13.1)      | 20 (15.2)    | 33 (12.9)      | 13 (10.5)    | 0.7394   |
| Number Injections during trial, Median (range)             | 0 (0-4)        | 0 (0-3)      | 0 (0-3)        | 0 (0-2)      | 0.6992   |

**\*Unadjusted p-values**

**Table S2.** P-values for model effect utilizing various missing data approaches

|                             | <b>Completers<br/>Cohort<sup>2</sup></b> | <b>LOCF<sup>3</sup></b> | <b>NRI<sup>4</sup></b> | <b>Observed<sup>5</sup></b> |
|-----------------------------|------------------------------------------|-------------------------|------------------------|-----------------------------|
| <b>N</b>                    | <b>365</b>                               | <b>755</b>              | <b>755</b>             | <b>See Below</b>            |
| <b>p-values<sup>1</sup></b> |                                          |                         |                        |                             |
| <b>Treatment</b>            | 0.9672                                   | 0.9170                  | 0.8431                 | 0.4793                      |
| <b>Timing</b>               | 0.0958                                   | 0.2144                  | 0.8826                 | 0.5501                      |
| <b>Visit Month</b>          | <b>0.0002</b>                            | <b>0.0076</b>           | 0.1769                 | 0.3600                      |
| <b>Baseline DAS</b>         | <b>&lt;0.0001</b>                        | <b>&lt;0.0001</b>       | <b>&lt;0.0001</b>      | <b>&lt;0.0001</b>           |
| <b>Trt*Time</b>             | 0.3015                                   | 0.7903                  | 0.3679                 | 0.2672                      |
| <b>Trt*Visit</b>            | 0.8036                                   | 0.4266                  | 0.7324                 | 0.6136                      |
| <b>Trt*BL DAS</b>           | 0.3869                                   | 0.1051                  | 0.9862                 | 0.8570                      |
| <b>Time*Visit</b>           | 0.1721                                   | 0.4654                  | 0.1628                 | 0.3618                      |
| <b>Time*BL DAS</b>          | 0.1682                                   | 0.5080                  | 0.9612                 | 0.1009                      |
| <b>BL DAS*Visit</b>         | 0.1434                                   | <b>0.0277</b>           | <b>&lt;0.0001</b>      | <b>0.0583</b>               |

1-Model selection: Full repeated measures mixed model with all interactions assessed, non-significant interactions removed, and the model fit with main effects and significant interactions. P-values for main effects and significant interactions are shown. P-values shown, effect estimates interpretations given under each specific method.

Treatment (Trt): MTX+ETN or MTX+SSZ+HCQ; Timing (Time): Immediate or Step-up; Visit Month: 8, 12, 16, 20, 24, 28, 32, 36, 40, 44, 48, 52, 56, 60, 64, 68, 72, 76, 80, 84, 88, 92, 96, 100, 104, 108, 112, 116, 120; Baseline DAS (BL DAS): DAS28-ESR at initial TEAR Visit

2-Completers: 365 participants with all DAS28-ESR scores for all week 48-102; 127 (52%) IE, 59 (16%) ST; p-value on % with complete data weeks 48-102 = 0.29

Week 48 DAS28-ESR higher than weeks 72, 84, 96 and 102 (3.2 vs 3.0, 3.0, 3.0, 2.9, respectively)  
Baseline DAS28-ESR: Effect estimate interpretation, every 1.0 higher at Baseline resulted in 0.4 higher DAS28-ESR

3-LOCF (Last Observation Carried Forward): Last observed DAS28-ESR carried forward for early terminations. Mean DAS28-ESR from adjacent visits given mean DAS28-ESR from adjacent visits

Baseline DAS28-ESR\*Visit Interaction: Those with higher DAS28-ESR scores showed more improvement over time. Lower baseline DAS28-ESR scores showed less improvement over time

4-NRI (Non Responders Imputation): All early terminations were assigned a DAS28-ESR of 5.1 for all subsequent visits handled under LOCF assumptions

Baseline DAS28-ESR\*Visit Interaction: Same interpretation as LOCF

5-Observed: All observed DAS28-ESR scores were used regardless of subsequent termination status. N for each visit: Week 48 (582), Week 60 (522), Week 84 (508), Week 96 (485), Week 102 (476)

Baseline DAS28-ESR\*Visit Interaction: Same interpretation as LOCF

**Table S3.** Mean DAS28-ESR at each visit week utilizing various missing data techniques and at time of early termination

| Analysis Set <sup>1</sup>                                                  | Mean DAS28-ESR at Visit Week (N if different from Baseline) |         |         |         |         |         |         |        |        |  |
|----------------------------------------------------------------------------|-------------------------------------------------------------|---------|---------|---------|---------|---------|---------|--------|--------|--|
|                                                                            | Baseline                                                    | 12      | 24      | 36      | 48      | 60      | 72      | 84     | 96     |  |
| <b>Completers Cohort</b>                                                   |                                                             |         |         |         |         |         |         |        |        |  |
| IE                                                                         | 5.8                                                         | 3.6     | 3.4     | 3.2     | 3.2     | 3.2     | 3.0     | 3.1    | 3.1    |  |
| IT                                                                         | 5.8                                                         | 3.8     | 3.4     | 3.3     | 3.1     | 3.1     | 2.9     | 3.1    | 3.0    |  |
| SE                                                                         | 5.9                                                         | 4.6     | 4.3     | 3.3     | 3.5     | 3.1     | 3.2     | 3.2    | 3.1    |  |
| ST                                                                         | 5.8                                                         | 4.3     | 3.9     | 3.3     | 3.0     | 2.8     | 2.9     | 2.8    | 2.7    |  |
| <b>LOCF</b>                                                                |                                                             |         |         |         |         |         |         |        |        |  |
| IE                                                                         | 5.8                                                         | 4.0     | 3.8     | 3.6     | 3.6     | 3.6     | 3.5     | 3.5    | 3.5    |  |
| IT                                                                         | 5.8                                                         | 4.1     | 3.8     | 3.6     | 3.5     | 3.6     | 3.5     | 3.6    | 3.4    |  |
| SE                                                                         | 5.8                                                         | 4.7     | 4.5     | 3.7     | 3.7     | 3.6     | 3.6     | 3.6    | 3.6    |  |
| ST                                                                         | 5.8                                                         | 4.6     | 4.3     | 3.9     | 3.7     | 3.7     | 3.7     | 3.6    | 3.6    |  |
| <b>NRI</b>                                                                 |                                                             |         |         |         |         |         |         |        |        |  |
| IE                                                                         | 5.8                                                         | 3.9     | 3.8     | 3.6     | 3.6     | 3.7     | 3.6     | 3.7    | 3.7    |  |
| IT                                                                         | 5.8                                                         | 4.1     | 3.8     | 3.7     | 3.5     | 3.7     | 3.7     | 3.8    | 3.7    |  |
| SE                                                                         | 5.8                                                         | 4.7     | 4.4     | 3.7     | 3.7     | 3.7     | 3.7     | 3.7    | 3.8    |  |
| ST                                                                         | 5.8                                                         | 4.4     | 4.2     | 3.8     | 3.6     | 3.6     | 3.7     | 3.6    | 3.6    |  |
| <b>Observed</b>                                                            |                                                             |         |         |         |         |         |         |        |        |  |
| IE                                                                         | 5.8                                                         | 3.8     | 3.6     | 3.3     | 3.3     | 3.2     | 3.1     | 3.1    | 3.1    |  |
| IT                                                                         | 5.8                                                         | 4.0     | 3.6     | 3.3     | 3.2     | 3.3     | 3.1     | 3.2    | 3.0    |  |
| SE                                                                         | 5.8                                                         | 4.6     | 4.3     | 3.4     | 3.4     | 3.2     | 3.3     | 3.2    | 3.1    |  |
| ST                                                                         | 5.8                                                         | 4.3     | 4.1     | 3.4     | 3.2     | 3.0     | 3.0     | 3.0    | 2.9    |  |
| <b>Early Terminations DAS28-ESR at TEAR Quarterly Visit (N with Visit)</b> |                                                             |         |         |         |         |         |         |        |        |  |
| IE                                                                         | 5.7(76)                                                     | 4.2(60) | 3.9(48) | 3.6(43) | 3.6(43) | 3.4(21) | 3.8(14) | 3.3(7) | 3.4(4) |  |
| IT                                                                         | 5.6(46)                                                     | 4.1(35) | 3.9(28) | 3.6(21) | 3.5(21) | 4.1(11) | 3.3(7)  | 3.6(3) | 4.1(2) |  |
| SE                                                                         | 5.8(73)                                                     | 4.8(56) | 4.4(38) | 3.8(31) | 3.8(30) | 3.3(16) | 2.9(8)  | 3.7(6) | 3.1(1) |  |
| ST                                                                         | 5.9(43)                                                     | 4.4(30) | 4.5(21) | 4.2(17) | 4.2(17) | 3.6(19) | 3.5(5)  | 4.1(5) | 5.3(2) |  |

1- Completers (N=365): Those with DAS28-ESR at all visits; LOCF (N=755): Last Observation Carried Forward with missing interim visits assigned mean value of adjacent visits; NRI (N=755): Non-Res Imputation with early terminations assigned DAS28-ESR of 5.1, missing interim visits handled under missingness assumptions; Observed (N varies by visit) utilizes all available DAS28-ESR regardless of subsequent termination status; IE, Immediate ETN+MTX; IT, Immediate SSZ+HCQ+MTX; SE, Step-up from MTX to SSZ+MTX+ETN if DAS28-ESR≥3.2 at Week 24; ST, Step-up from MTX to MTX+SSZ+HCQ if DAS28-ESR≥3.2 at Week 24.
